# Supplementary material
Source: MDPI journal article supplement (https://www.mdpi.com/2073-4395/14/5/1033)
Supplement: s1 [file s1]

**Table S1.** Sum of the concentrations of the major volatile compounds identified (mg·L<sup>-1</sup>) grouped by chemical families, in white varieties.

| Variety-origin         | Alcohols | Alcohols* | C <sub>6</sub> | Esters | Acetates | Acetates* | Acids  | Acids* | Carbonyls | Others   | Others* |
|------------------------|----------|-----------|----------------|--------|----------|-----------|--------|--------|-----------|----------|---------|
| ‘Albana–A’             | 212.04   | 184.39    | 10.28          | 16.00  | 74.36    | 4.60      | 168.70 | 10.33  | 59.66     | 6136.98  | 727.08  |
| ‘Albana–C’             | 405.87   | 362.55    | 115.82         | 111.57 | 96.31    | 7.94      | 351.44 | 4.81   | 24.16     | 10083.19 | 1417.32 |
| ‘Albilla do Avia’      | 304.62   | 277.92    | 157.65         | 29.38  | 42.94    | 7.89      | 200.72 | 10.38  | 48.95     | 6521.73  | 1079.69 |
| ‘Albillo del Pozo’     | 249.39   | 217.06    | 9.34           | 23.78  | 53.05    | 9.74      | 121.97 | 7.69   | 65.81     | 5701.89  | 818.29  |
| ‘Bastardo Blanco’      | 369.67   | 336.96    | 20.31          | 45.42  | 67.55    | 20.15     | 87.82  | 7.52   | 29.28     | 8415.25  | 849.84  |
| ‘Castellana Blanca–CM’ | 321.50   | 289.29    | 29.64          | 30.86  | 46.31    | 13.27     | 137.18 | 9.93   | 65.62     | 6145.55  | 683.64  |
| ‘Castellana Blanca–M’  | 305.85   | 282.36    | 194.80         | 43.11  | 53.29    | 14.67     | 146.39 | 10.05  | 68.01     | 6086.54  | 752.74  |
| ‘Castellana Blanca–N’  | 309.87   | 277.26    | 30.91          | 24.41  | 67.21    | 13.25     | 180.38 | 27.20  | 51.41     | 6574.80  | 636.11  |
| ‘Cayetana’             | 310.85   | 273.00    | 52.97          | 22.72  | 66.63    | 17.57     | 72.46  | 9.72   | 58.82     | 4007.16  | 782.84  |
| ‘Diega 2’              | 347.35   | 317.07    | 67.40          | 14.64  | 56.41    | 19.70     | 159.07 | 6.11   | 62.32     | 5880.89  | 705.10  |
| ‘Evena 1’              | 280.19   | 239.88    | 18.52          | 32.30  | 96.87    | 13.16     | 128.75 | 8.68   | 59.82     | 5931.23  | 958.50  |
| ‘Folgasao’             | 414.13   | 394.54    | 12.78          | 45.16  | 84.64    | 32.66     | 226.90 | 7.05   | 47.19     | 7969.71  | 623.65  |
| ‘Greta’                | 234.90   | 204.14    | 22.43          | 15.87  | 62.31    | 4.38      | 208.80 | 7.80   | 65.26     | 5499.29  | 685.40  |
| ‘Hebén-E’              | 351.23   | 317.26    | 2.59           | 27.47  | 51.31    | 20.70     | 235.22 | 9.52   | 168.09    | 7283.17  | 487.95  |
| ‘Hebén-M’              | 293.93   | 267.20    | 24.28          | 18.11  | 50.37    | 12.59     | 224.93 | 7.74   | 95.62     | 6987.60  | 965.40  |
| ‘Indiana’              | 217.01   | 192.21    | 21.74          | 20.23  | 42.35    | 4.88      | 145.77 | 11.26  | 40.24     | 4926.84  | 634.07  |
| ‘Jarrosuelto-A’        | 265.90   | 235.85    | 9.93           | 67.63  | 78.08    | 8.70      | 147.11 | 8.48   | 69.50     | 6286.68  | 744.28  |
| ‘Jarrosuelto-CM’       | 249.43   | 225.20    | 95.82          | 28.34  | 45.57    | 13.92     | 174.27 | 36.11  | 82.09     | 6270.36  | 768.05  |
| ‘Jarrosuelto-N’        | 386.70   | 349.00    | 42.67          | 23.10  | 62.79    | 23.20     | 76.59  | 4.49   | 174.21    | 8304.19  | 905.71  |
| ‘Maquías’              | 309.83   | 281.98    | 61.49          | 39.76  | 47.65    | 14.70     | 163.91 | 20.09  | 73.97     | 7005.29  | 977.46  |
| ‘Marco 1 (MC1)’        | 340.97   | 301.81    | 104.06         | 33.63  | 57.34    | 8.26      | 377.74 | 16.88  | 62.94     | 10169.07 | 1982.57 |
| ‘Montonera del Casar’  | 331.75   | 272.41    | 6.34           | 25.78  | 39.67    | 9.50      | 158.46 | 7.13   | 65.73     | 6004.42  | 723.80  |
| ‘Ratiño’               | 369.22   | 338.98    | 107.61         | 28.68  | 69.26    | 30.37     | 274.49 | 18.62  | 47.47     | 8308.25  | 1335.43 |
| ‘Riera 46’             | 274.90   | 250.53    | 118.81         | 18.84  | 37.24    | 7.06      | 134.02 | 14.75  | 30.28     | 5576.90  | 611.07  |
| ‘Rufete Serrano’       | 355.69   | 321.02    | 148.05         | 23.13  | 70.25    | 18.76     | 160.12 | 8.53   | 37.22     | 8873.11  | 1267.32 |
| ‘Verdejo Serrano’      | 354.25   | 315.04    | 103.67         | 46.23  | 64.49    | 20.45     | 319.43 | 7.20   | 51.63     | 9221.78  | 1056.96 |

|                        |        |        |        |       |       |       |        |       |       |         |        |
|------------------------|--------|--------|--------|-------|-------|-------|--------|-------|-------|---------|--------|
| <b>'Zurieleles-CM'</b> | 285.94 | 247.30 | 44.92  | 21.42 | 54.24 | 21.97 | 184.56 | 50.90 | 90.13 | 6490.28 | 748.97 |
| <b>'Zurieleles-E'</b>  | 310.91 | 277.66 | 115.08 | 26.95 | 53.63 | 17.14 | 155.49 | 9.54  | 51.06 | 8230.04 | 971.54 |

Varieties specifications: See **Table 1**. Alcohols\*: sum of the concentrations of alcoholic compounds without methanol; Acetates\*: sum of the concentrations of acetate compounds without ethyl acetate; Acids\*: sum of the concentrations of acid compounds without acetic acid; Others\*: sum of the concentrations of compounds classified in 'others' group without glycerol.

**Table S2.** Sum of the concentrations of the minor volatile compounds identified (lactones in mg·L<sup>-1</sup> and terpenes and C<sub>13</sub> norisoprenoids in µg·L<sup>-1</sup>) grouped by chemical families, in white varieties.

| Variety-origin         | Lactones | Terpenes | C <sub>13</sub> norisoprenoids |
|------------------------|----------|----------|--------------------------------|
| ‘Albana-A’             | 7.12     | 39.31    | 0.83                           |
| ‘Albana-C’             | 14.06    | 28.90    | 0.55                           |
| ‘Albilla do Avia’      | 6.51     | 168.82   | 0.26                           |
| ‘Albillo del Pozo’     | 5.48     | 24.81    | 0.41                           |
| ‘Bastardo Blanco’      | 6.95     | 37.67    | 0.50                           |
| ‘Castellana Blanca-CM’ | 5.75     | 25.43    | 0.84                           |
| ‘Castellana Blanca-M’  | 6.60     | 29.61    | 0.58                           |
| ‘Castellana Blanca-N’  | 7.93     | 54.57    | 0.51                           |
| ‘Cayetana’             | 4.53     | 30.75    | 0.44                           |
| ‘Diega 2’              | 6.37     | 24.43    | 0.92                           |
| ‘Evena 1’              | 5.61     | 24.46    | 0.35                           |
| ‘Folgasao’             | 14.59    | 66.01    | 0.53                           |
| ‘Greta’                | 6.29     | 32.22    | 0.75                           |
| ‘Hebén-E’              | 13.11    | 47.44    | 0.99                           |
| ‘Hebén-M’              | 7.49     | 36.64    | 1.60                           |
| ‘Indiana’              | 5.22     | 37.80    | 0.37                           |
| ‘Jarrosuelto-A’        | 9.67     | 48.45    | 0.46                           |
| ‘Jarrosuelto-CM’       | 5.28     | 39.32    | 0.25                           |
| ‘Jarrosuelto-N’        | 10.44    | 22.37    | 0.41                           |
| ‘Maquías’              | 6.38     | 32.93    | 1.26                           |
| ‘Marco 1 (MC1)’        | 8.68     | 112.41   | 0.40                           |
| ‘Montonera del Casar’  | 6.82     | 37.17    | 0.62                           |
| ‘Ratiño’               | 21.40    | 55.80    | 0.30                           |
| ‘Riera 46’             | 5.29     | 29.42    | 0.64                           |
| ‘Rufete Serrano’       | 9.32     | 34.21    | 0.74                           |
| ‘Verdejo Serrano’      | 12.66    | 77.63    | 1.05                           |
| ‘Zurieleles-CM’        | 4.37     | 32.29    | 0.92                           |
| ‘Zurieleles-E’         | 11.39    | 43.83    | 0.55                           |

Varieties specifications: See **Table 1**.

**Table S3.** Sum of the concentrations of the major volatile compounds identified (mg·L<sup>-1</sup>) grouped by chemical families, in red varieties.

| Variety-origin       | Alcohols | Alcohols* | C <sub>6</sub> | Esters | Acetates | Acetates* | Acids  | Acids* | Carbonyls | Others   | Others* |
|----------------------|----------|-----------|----------------|--------|----------|-----------|--------|--------|-----------|----------|---------|
| ‘Benedicto’          | 474.62   | 362.71    | 114.96         | 20.65  | 81.04    | 27.84     | 220.88 | 5.09   | 63.94     | 8441.01  | 1409.77 |
| ‘Cadrete-N’          | 529.63   | 407.18    | 93.49          | 74.76  | 84.54    | 12.90     | 184.12 | 7.78   | 51.50     | 9329.76  | 1360.47 |
| ‘Callet’             | 553.94   | 382.41    | 43.95          | 141.26 | 82.64    | 27.84     | 546.61 | 6.66   | 61.68     | 9264.67  | 944.38  |
| ‘Cenicienta’         | 700.80   | 428.77    | 148.36         | 148.64 | 106.29   | 19.44     | 143.53 | 10.65  | 61.18     | 8237.96  | 1408.44 |
| ‘Corchera’           | 551.99   | 331.07    | 76.87          | 59.98  | 79.79    | 12.00     | 212.52 | 6.58   | 25.99     | 8677.42  | 1119.59 |
| ‘Diega 1’            | 563.76   | 410.67    | 48.38          | 85.45  | 58.59    | 9.19      | 214.32 | 5.09   | 51.80     | 8243.19  | 783.88  |
| ‘Estaladiña’         | 696.73   | 481.75    | 40.32          | 205.14 | 66.40    | 16.50     | 139.60 | 9.53   | 23.64     | 10087.67 | 1058.98 |
| ‘Garró’              | 455.00   | 336.39    | 149.29         | 44.05  | 60.43    | 24.23     | 160.64 | 3.98   | 65.27     | 7216.70  | 1129.25 |
| ‘Gorgollosa’         | 508.16   | 357.29    | 63.53          | 55.95  | 123.72   | 28.64     | 513.45 | 4.31   | 166.54    | 8653.90  | 874.44  |
| ‘Hondarribi Beltza’  | 559.55   | 407.88    | 206.76         | 62.43  | 132.71   | 62.08     | 257.96 | 3.05   | 72.83     | 9551.80  | 1010.00 |
| ‘Mandregue’          | 475.11   | 310.21    | 69.75          | 24.77  | 88.92    | 38.36     | 343.79 | 9.04   | 122.32    | 11442.08 | 1595.07 |
| ‘Marco 2 (MC2)’      | 473.23   | 325.54    | 93.02          | 66.98  | 56.81    | 6.94      | 495.60 | 27.36  | 45.13     | 8880.56  | 925.31  |
| ‘Melonera’           | 523.75   | 336.55    | 110.73         | 22.39  | 85.12    | 9.01      | 235.25 | 7.91   | 61.61     | 9651.20  | 1776.43 |
| ‘Morate-M’           | 542.34   | 341.54    | 72.04          | 45.40  | 51.08    | 17.01     | 235.71 | 5.87   | 50.01     | 8505.04  | 1276.56 |
| ‘Morate-N’           | 573.50   | 364.77    | 169.38         | 42.86  | 62.68    | 15.28     | 322.66 | 5.48   | 70.28     | 9100.24  | 1254.80 |
| ‘Rayada Melonera’    | 435.16   | 297.19    | 196.04         | 41.26  | 64.25    | 6.93      | 212.93 | 7.51   | 34.90     | 8991.60  | 1255.08 |
| ‘Riera 2’            | 658.53   | 412.59    | 54.05          | 22.01  | 107.56   | 26.58     | 547.77 | 3.91   | 94.91     | 14013.48 | 1857.32 |
| ‘Riera 43’           | 408.09   | 327.90    | 40.78          | 38.40  | 67.08    | 26.01     | 249.89 | 8.66   | 100.11    | 8309.86  | 782.49  |
| ‘Sanguina-C’         | 494.08   | 324.02    | 46.98          | 58.78  | 70.23    | 17.75     | 439.61 | 3.86   | 66.93     | 10513.86 | 1311.42 |
| ‘Sanguina-CM’        | 547.77   | 380.54    | 68.93          | 37.97  | 39.51    | 14.37     | 203.62 | 5.05   | 50.15     | 8338.96  | 1134.35 |
| ‘Santa Fé-A’         | 409.25   | 302.59    | 55.07          | 13.32  | 53.78    | 6.63      | 194.26 | 5.69   | 131.67    | 8444.05  | 1155.25 |
| ‘Terriza-CM’         | 541.36   | 434.56    | 130.22         | 47.09  | 62.99    | 14.08     | 161.29 | 7.08   | 48.65     | 7036.80  | 944.35  |
| ‘Terriza-M’          | 525.67   | 366.65    | 197.45         | 67.09  | 59.36    | 14.83     | 265.55 | 6.91   | 47.36     | 8081.57  | 1216.46 |
| ‘Tinta Jeromo-CL’    | 629.81   | 366.81    | 78.54          | 173.88 | 135.43   | 16.07     | 141.15 | 10.35  | 72.62     | 10560.34 | 1667.79 |
| ‘Tinta Jeromo-CM’    | 631.93   | 386.07    | 36.20          | 63.02  | 73.10    | 18.76     | 249.92 | 4.59   | 66.46     | 7457.95  | 724.42  |
| ‘Tortozona Tinta-A’  | 531.64   | 349.44    | 85.99          | 36.60  | 75.03    | 8.86      | 159.33 | 4.97   | 60.49     | 7208.07  | 943.46  |
| ‘Tortozona Tinta-CM’ | 368.35   | 303.49    | 99.04          | 35.42  | 45.42    | 8.48      | 282.31 | 8.09   | 112.13    | 6333.24  | 764.14  |

|                            |        |        |        |        |       |       |        |       |       |          |         |
|----------------------------|--------|--------|--------|--------|-------|-------|--------|-------|-------|----------|---------|
| <b>'Tortozona Tinta-M'</b> | 463.14 | 329.13 | 289.44 | 64.35  | 72.95 | 17.85 | 267.58 | 20.33 | 45.89 | 8377.99  | 1299.62 |
| <b>'Tortozona Tinta-N'</b> | 601.97 | 391.61 | 189.62 | 67.71  | 79.54 | 11.18 | 301.98 | 4.10  | 75.21 | 10402.78 | 1281.70 |
| <b>'Trobat'</b>            | 621.14 | 405.66 | 98.15  | 99.59  | 75.50 | 32.93 | 367.79 | 4.10  | 26.94 | 8747.33  | 1163.85 |
| <b>'Xafardán'</b>          | 573.38 | 449.91 | 361.16 | 150.93 | 71.71 | 30.89 | 321.63 | 12.07 | 31.38 | 10526.43 | 1674.48 |
| <b>'Zamarrica'</b>         | 561.02 | 383.19 | 218.37 | 152.20 | 94.96 | 6.56  | 354.37 | 8.57  | 24.52 | 10010.69 | 1363.62 |

Varieties specifications: See **Table 1**. Alcohols\*: sum of the concentrations of alcoholic compounds without methanol; Acetates\*: sum of the concentrations of acetate compounds without ethyl acetate; Acids\*: sum of the concentrations of acid compounds without acetic acid; Others\*: sum of the concentrations of compounds classified in 'others' group without glycerol.

**Table S4.** Sum of the concentrations of the minor volatile compounds identified (lactones in mg·L<sup>-1</sup> and terpenes and C<sub>13</sub> norisoprenoids in µg·L<sup>-1</sup>) grouped by chemical families, in red varieties.

| Variety-origin       | Lactones | Terpenes | C <sub>13</sub> norisoprenoids |
|----------------------|----------|----------|--------------------------------|
| 'Benedicto'          | 10.45    | 21.04    | 1.18                           |
| 'Cadrete-N'          | 15.84    | 57.23    | 0.64                           |
| 'Callet'             | 21.86    | 37.63    | 1.73                           |
| 'Cenicienta'         | 17.03    | 36.83    | 0.58                           |
| 'Corchera'           | 12.69    | 31.67    | 1.34                           |
| 'Diega 1'            | 8.73     | 100.40   | 1.51                           |
| 'Estaladiña'         | 14.02    | 67.75    | 0.90                           |
| 'Garró'              | 7.68     | 21.93    | 0.92                           |
| 'Gorgollosa'         | 19.20    | 46.21    | 0.77                           |
| 'Hondarribi Beltza'  | 12.07    | 31.40    | 1.28                           |
| 'Mandregue'          | 12.92    | 87.70    | 1.19                           |
| 'Marco 2 (MC2)'      | 22.33    | 41.12    | 0.83                           |
| 'Melonera'           | 8.78     | 36.38    | 0.91                           |
| 'Morate-M'           | 8.47     | 97.46    | 1.29                           |
| 'Morate-N'           | 9.39     | 32.70    | 0.81                           |
| 'Rayada Melonera'    | 7.66     | 39.56    | 0.64                           |
| 'Riera 2'            | 19.59    | 68.63    | 1.26                           |
| 'Riera 43'           | 7.85     | 22.32    | 2.43                           |
| 'Sanguina-C'         | 21.03    | 32.84    | 2.24                           |
| 'Sanguina-CM'        | 11.78    | 67.61    | 1.87                           |
| 'Santa Fé-A'         | 8.55     | 39.78    | 2.10                           |
| 'Terriza-CM'         | 7.85     | 64.33    | 1.64                           |
| 'Terriza-M'          | 8.39     | 48.38    | 0.83                           |
| 'Tinta Jeromo-CL'    | 26.87    | 44.73    | 1.41                           |
| 'Tinta Jeromo-CM'    | 7.07     | 63.65    | 0.67                           |
| 'Tortozona Tinta-A'  | 7.56     | 92.31    | 1.60                           |
| 'Tortozona Tinta-CM' | 7.22     | 39.99    | 2.47                           |
| 'Tortozona Tinta-M'  | 8.36     | 32.43    | 1.17                           |
| 'Tortozona Tinta-N'  | 18.62    | 53.32    | 1.98                           |
| 'Trobat'             | 15.45    | 64.80    | 1.90                           |
| 'Xafardán'           | 13.70    | 61.70    | 0.84                           |
| 'Zamarrika'          | 21.73    | 45.77    | 0.62                           |

Varieties specifications: See **Table 1**.
